# Supplementary material for: Embedded proteins and sacrificial bonds provide the strong adhesive properties of gastroliths
Source: Royal Society of Chemistry journal article supplement (doi:10.1039/c2nr30536d), 2012-01-01
Supplement: c2nr30536d.pdf [file c2nr30536d.pdf]

## Supplementary material

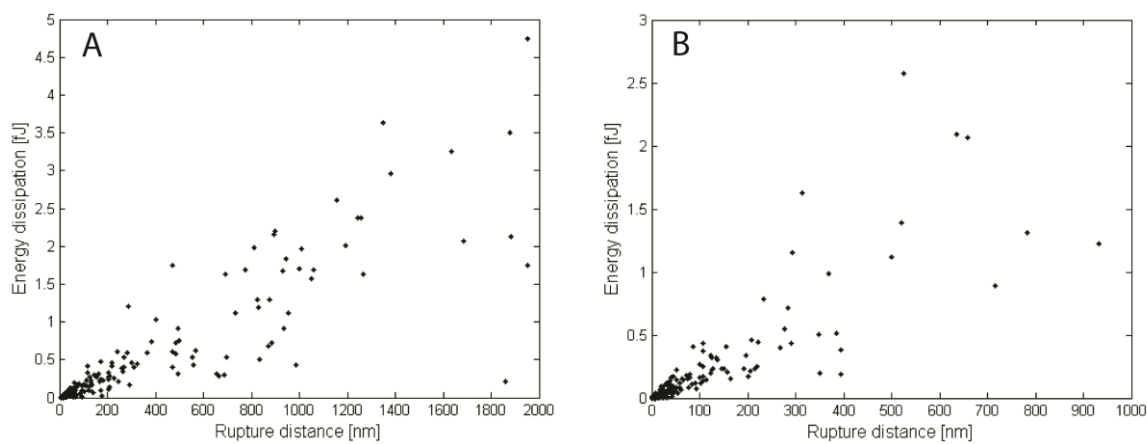

**Figure S1.** Correlation between the amount of dissipated energy and the final detachment distance for the case of interaction between a heavily demineralized gastrolith probe (A) and a native gastrolith sample and between a CaCO<sub>3</sub> probe and a native gastrolith sample (B), respectively.
